# Supplementary material
Source: PubMed Central journal article supplement (PMC9300815)
Supplement: NIHMS1788475-supplement-Supplemental_Tables_1__2__3_and_4.pdf [file NIHMS1788475-supplement-Supplemental_Tables_1__2__3_and_4.pdf]

**Table 1.** Graft-loss in FT wounds treated with mSTSG and ASCS at Day 5.

| <b>Animal</b> | <b>Wound</b>    | <b>Treatment</b> | <b>Grade</b> |
|---------------|-----------------|------------------|--------------|
| 3             | Right (cranial) | Polymer          | 0            |
|               | Right (caudal)  | Control          | 2            |
|               | Left (cranial)  | Control          | 1            |
|               | Left (caudal)   | Polymer          | 1            |
| 4             | Right (cranial) | Control          | 2            |
|               | Right (caudal)  | Polymer          | 2            |
|               | Left (cranial)  | Polymer          | 1.5          |
|               | Left (caudal)   | Control          | 0.5          |

**Supplementary Table 1.** Primary dressing Treatment Groups in DPT and FT Injuries.

| <b>Animal</b> | <b>Wound</b>    | <b>Treatment</b> |
|---------------|-----------------|------------------|
| 1 and 3       | Right (cranial) | Polymer          |
|               | Right (caudal)  | Control          |
|               | Left (cranial)  | Control          |
|               | Left (caudal)   | Polymer          |
| 2 and 4       | Right (cranial) | Control          |
|               | Right (caudal)  | Polymer          |
|               | Left (cranial)  | Polymer          |
|               | Left (caudal)   | Control          |

**Supplementary Table 2.** Graft-loss grading scale.

| <b>Grade</b> | <b>Area lost</b> | <b>Topical wound care required</b> | <b>Surgery indicated</b> |
|--------------|------------------|------------------------------------|--------------------------|
| I            | Minimal          | -                                  | -                        |
| II           | <50%             | +/-                                | -                        |
| III          | <50%             | +                                  | +/-                      |
| IV           | >50%             | +                                  | +                        |

**Supplementary Table 3.** ASCS viability and cell counts for DPT wounds.

| <b>Animal Number</b> | <b>Assay</b> | <b>RES Viability (%)</b> | <b>Total Cell Count (cells/cm<sup>2</sup>)</b> |
|----------------------|--------------|--------------------------|------------------------------------------------|
| 1                    | Trypan Blue  | 39.66 ± 7.49             | 8.90E5 ± 1.16E5                                |
|                      | Fluorescent  | 31.36 ± 7.17             | 7.88E5 ± 1.43E5                                |
| 2                    | Trypan Blue  | 49.00 ± 10.36            | 9.55E5 ± 1.45E5                                |
|                      | Fluorescent  | 55.48 ± 7.26             | 1.31E6 ± 2.31E5                                |

**Supplementary Table 4.** ASCS viability and cell counts for FT wounds.

| <b>Animal Number</b> | <b>Assay</b> | <b>RES Viability (%)</b> | <b>Total Cell Count (cells/cm<sup>2</sup>)</b> |
|----------------------|--------------|--------------------------|------------------------------------------------|
| 3                    | Trypan Blue  | 74.71 ± 6.46             | 8.40E5 ± 1.80E5                                |
|                      | Fluorescent  | 49.19 ± 4.09             | 1.42E6 ± 2.30E5                                |
| 4                    | Trypan Blue  | 81.44 ± 13.70            | 7.65E5 ± 2.19E5                                |
|                      | Fluorescent  | 72.42 ± 6.40             | 1.20E6 ± 2.64E5                                |
